# Supplementary material
Source: bioRxiv or medRxiv preprint supplement (https://www.biorxiv.org/highwire/filestream/125689/field_highwire_adjunct_files/5/416701-5.pdf)
Supplement: Supplementary file [file 416701-5.pdf]

| Parameter                                      | Definition                                                                          | Units                                                 |
|------------------------------------------------|-------------------------------------------------------------------------------------|-------------------------------------------------------|
| <i>Biomass and substrate components</i>        |                                                                                     |                                                       |
| $X_H$                                          | Concentration of heterotrophic bacteria                                             | $\text{gCOD m}^{-3}$                                  |
| $X_A$                                          | Concentration of ammonium-oxidizing bacteria (AOB)                                  | $\text{gCOD m}^{-3}$                                  |
| $X_N$                                          | Concentration of nitrite-oxidizing bacteria (NOB)                                   | $\text{gCOD m}^{-3}$                                  |
| $X_I$                                          | Concentration of inert solids                                                       | $\text{gTS m}^{-3}$                                   |
| $S_O$                                          | Concentration of dissolved oxygen                                                   | $\text{gO}_2 \text{ m}^{-3}$                          |
| $S_N$                                          | Concentration of nitrite                                                            | $\text{gN m}^{-3}$                                    |
| $S_A$                                          | Concentration of ammonium                                                           | $\text{gN m}^{-3}$                                    |
| $S_C$                                          | Concentration of soluble, readily biodegradable organics                            | $\text{gCOD m}^{-3}$                                  |
| <i>Kinetic and stoichiometric coefficients</i> |                                                                                     |                                                       |
| $\mu_{H\max}$                                  | Maximum growth rate of heterotrophs                                                 | $\text{d}^{-1}$                                       |
| $b_H$                                          | Aerobic endogenous respiration rate constant for heterotrophs                       | $\text{d}^{-1}$                                       |
| $K_{OH}$                                       | Affinity constant for oxygen of heterotrophs                                        | $\text{gO}_2 \text{ m}^{-3}$                          |
| $K_C$                                          | Affinity constant for organics of heterotrophs                                      | $\text{gCOD m}^{-3}$                                  |
| $Y_H$                                          | Yield coefficient for heterotrophs growing aerobically                              | $\text{gCOD}_{XH} \text{ g}^{-1}\text{COD}_{SC}$      |
| $\mu_{A\max}$                                  | Maximum growth rate of AOB                                                          | $\text{d}^{-1}$                                       |
| $b_A$                                          | Aerobic endogenous respiration rate constant for AOB                                | $\text{d}^{-1}$                                       |
| $K_{OA}$                                       | Affinity constant for oxygen of AOB                                                 | $\text{gO}_2 \text{ m}^{-3}$                          |
| $K_A$                                          | Affinity constant for ammonium of AOB                                               | $\text{gN m}^{-3}$                                    |
| $Y_A$                                          | Yield coefficient for AOB                                                           | $\text{gCOD}_{XA} \text{ g}^{-1}\text{NH}_4\text{-N}$ |
| $\mu_{N\max}$                                  | Maximum growth rate of NOB                                                          | $\text{d}^{-1}$                                       |
| $b_N$                                          | Aerobic endogenous respiration rate constant for NOB                                | $\text{d}^{-1}$                                       |
| $K_{ON}$                                       | Affinity constant for oxygen of NOB                                                 | $\text{gO}_2 \text{ m}^{-3}$                          |
| $K_N$                                          | Affinity constant for $\text{NO}_2^-$ of NOB                                        | $\text{gN m}^{-3}$                                    |
| $Y_N$                                          | Yield coefficient for NOB                                                           | $\text{gCOD}_{XN} \text{ g}^{-1}\text{NO}_2\text{-N}$ |
|                                                |                                                                                     |                                                       |
| $f_{XI}$                                       | Fraction live biomass being convert to inert material during endogenous respiration |                                                       |
| $i_{NX}$                                       | Nitrogen content in biomass                                                         | $\text{gNH}_4\text{-N g}^{-1}\text{COD}$              |
| <i>Physical parameters</i>                     |                                                                                     |                                                       |
| $D_{W\_O}$                                     | Diffusion coefficient of oxygen in water                                            | $\text{m}^2 \text{ s}^{-1}$                           |
| $D_{W\_N}$                                     | Diffusion coefficient of nitrite in water                                           | $\text{m}^2 \text{ s}^{-1}$                           |
| $D_{W\_A}$                                     | Diffusion coefficient of ammonium in water                                          | $\text{m}^2 \text{ s}^{-1}$                           |
| $D_{W\_C}$                                     | Diffusion coefficient of organic carbon in water                                    | $\text{m}^2 \text{ s}^{-1}$                           |
| $D_e$                                          | Effective diffusion coefficient, i.e. diffusion coefficient in biofilm              | $\text{m}^2 \text{ s}^{-1}$                           |
| $f_{VS}$                                       | Fraction of the total solids that is live, active bacteria                          |                                                       |
| $f_{XH}$                                       | Fraction of the live bacteria that is aerobic heterotrophs                          |                                                       |
| $f_{XA}$                                       | Fraction of the live bacteria that is AOB                                           |                                                       |
| $f_{XN}$                                       | Fraction of the live bacteria that is NOB                                           |                                                       |
|                                                |                                                                                     |                                                       |
| $S_{O,\text{bulk}}$                            | Concentration dissolved oxygen in bulk liquid                                       | $\text{gO}_2 \text{ m}^{-3}$                          |
| $S_{N,\text{bulk}}$                            | Concentration nitrite in bulk liquid                                                | $\text{gN m}^{-3}$                                    |
| $S_{A,\text{bulk}}$                            | Concentration ammonium in bulk liquid                                               | $\text{gN m}^{-3}$                                    |

|               |                                                        |                |
|---------------|--------------------------------------------------------|----------------|
| $S_{C,bulk}$  | Concentration organic carbon in bulk liquid            | $gCOD\ m^{-3}$ |
|               |                                                        |                |
| $L$           | Biofilm thickness                                      | m              |
| $\Delta x$    | Thickness of layer in biofilm                          | m              |
| $X_{TS}$      | Biofilm density                                        | $gTS\ m^{-3}$  |
| $\delta_{BL}$ | Bulk liquid-biofilm diffusion boundary layer thickness | M              |
